# Supplementary material
Source: PubMed Central journal article supplement (PMC6167725)
Supplement: an8b01268_si_001.pdf [file an8b01268_si_001.pdf]

## *Supporting Information for*

### Surface Structuring and Water Interactions of Nanocellulose Filaments Modified with Organosilanes toward Wearable Materials

*Ana G. Cunha<sup>\*†</sup>, Meri Lundahl<sup>†</sup>, Mohd Farhan Ansari<sup>‡#</sup>, Leena-Sisko Johansson<sup>†</sup>, Joseph M. Campbell<sup>†</sup>, Orlando J. Rojas<sup>\*†</sup>*

<sup>†</sup>Department of Bioproducts and Biosystems, Aalto University, P.O. Box 16300, 00076 Aalto, Finland. \* Email: aggcunha@gmail.com (A.G.C.), +46 73 059 7910 and orlando.rojas@aalto.fi (O.J.R.), +358 50 512 4227.

<sup>‡</sup>Department of Fibre and Polymer Technology and <sup>#</sup>Wallenberg Wood Science Center, KTH Royal Institute of Technology, SE-100 44 Stockholm, Sweden

*This Supporting Information document contains two figures and two tables in three pages.*

**Thermogravimetric analysis (TGA).** TGA was carried out using a TA Instruments Q500 Thermogravimetric Analyzer. Filament samples of *ca.* 2 mg were heated from 40 to 800 °C at 10 °C.min<sup>-1</sup> in an inert environment provided by a 20 mL.min<sup>-1</sup> nitrogen purge.

Thermograms (Figure S1) showed that the unmodified filament exhibited the typical thermal degradation behavior of unmodified cellulose nanofibrils, presenting a single main step of thermal degradation, with maximum decomposition rate ( $T_{d_{max}}$ ) at 308 °C. The modified filaments were shown to be slightly less stable (except the TCf5 sample), since they started decomposing at lower temperatures, albeit with a less abrupt decay, probably due to a corresponding lower heat transfer to cellulose, resulting from the presence of the inorganic coating around the filament. Moreover, their thermograms revealed a slightly more complex degradation behavior, with additional decomposition steps (compared to that of the unmodified filament). The first step, with  $T_{d_{max1}}$  around 220-240 °C, is attributed to the decomposition of the organic functions (methyl groups) in the hybrid coatings. Additionally, the  $T_{d_{max2}}$  for the second decomposition step decreased, compared to the equivalent  $T_{d_{max}}$  in the precursor CNF

filament, varying in the range 292-300 °C (except for the TCf5 sample, to which it was 314 °C). Nonetheless, the higher amount of final residue at *ca.* 800 °C for the modified filaments corroborates the presence of an inorganic environment around them.

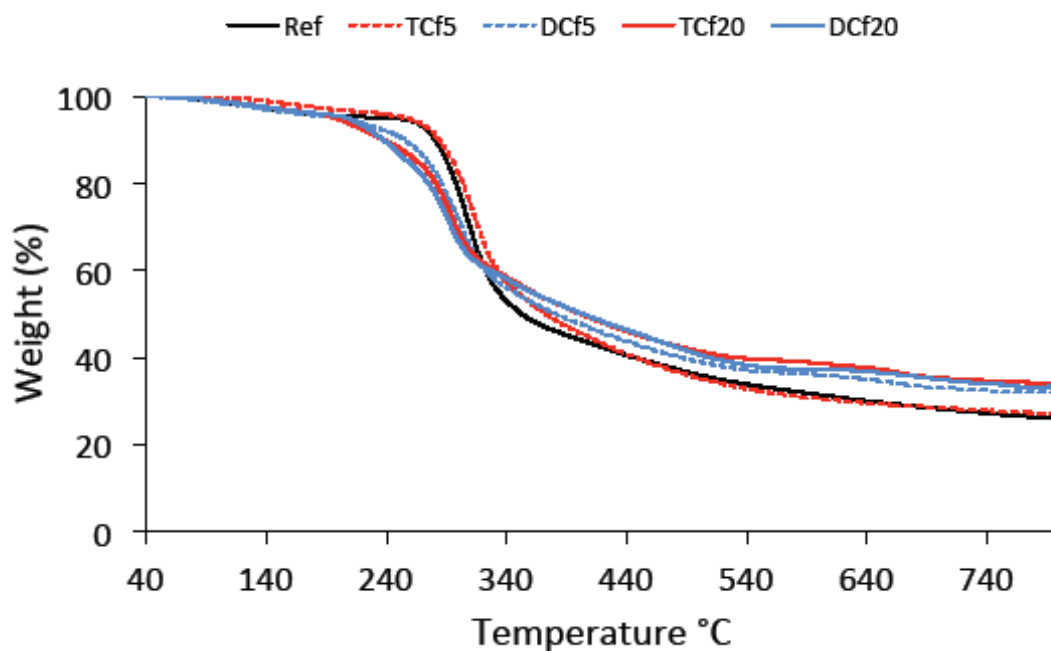

**Figure S1.** TGA thermograms of unmodified and organosilane-modified CNF filaments.

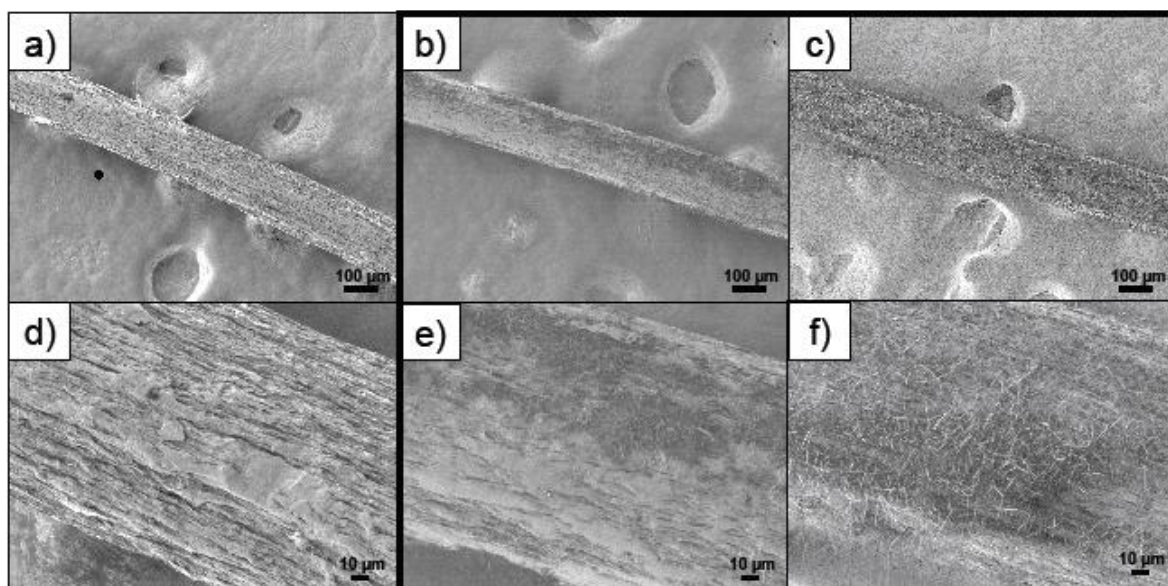

**Figure S2.** SEM micrographs at different magnifications of unmodified and organosilane-modified CNF filaments: Ref (a and d), TCf5 (b and e) and TCf20 (c and f) at 100x (a, b and c) and 500x (d, e and f) magnification.

## Contact angle

**Table S1.** Contact angles of given fluids on unmodified and organosilane-modified CNF filaments with the calculated surface energy.

|       | Contact angle (°) |           |               | Surface energy (mJ.m <sup>-2</sup> ) |                         |       |
|-------|-------------------|-----------|---------------|--------------------------------------|-------------------------|-------|
|       | Water             | Formamide | Diiodomethane | Polar contribution                   | Dispersive contribution | Total |
| Ref   | 57 ± 3            | 37 ± 6    | 61 ± 4        | 19.48                                | 27.87                   | 47.35 |
| TCf5  | 85 ± 5            | 91 ± 2    | 79 ± 10       | 7.80                                 | 13.53                   | 21.34 |
| TCf10 | 96 ± 9            | 94 ± 2    | 87 ± 5        | 4.52                                 | 11.81                   | 16.34 |
| TCf15 | 100 ± 1           | 99 ± 5    | 90 ± 5        | 3.60                                 | 10.45                   | 14.05 |
| TCf20 | 116 ± 3           | 102 ± 2   | 100 ± 10      | 0.88                                 | 8.90                    | 9.77  |
| DCf5  | 94 ± 6            | 99 ± 3    | 75 ± 4        | 3.38                                 | 14.86                   | 18.23 |
| DCf10 | 94 ± 3            | 98 ± 5    | 78 ± 3        | 3.82                                 | 13.94                   | 17.76 |
| DCf15 | 98 ± 3            | 98 ± 2    | 77 ± 6        | 2.42                                 | 15.00                   | 17.43 |
| DCf20 | 96 ± 3            | 98 ± 4    | 80 ± 5        | 3.43                                 | 13.53                   | 16.97 |

## Tensile strength

**Table S2.** Tensile strength and Young's modulus of unmodified and organosilane-modified CNF filaments in dry and wet conditions.

|       | Dry conditions         |                       | Wet conditions         |                       |
|-------|------------------------|-----------------------|------------------------|-----------------------|
|       | Tensile strength (MPa) | Young's Modulus (GPa) | Tensile strength (MPa) | Young's Modulus (MPa) |
| Ref   | 161.9 ± 17.9           | 9.1 ± 0.6             | 1.9 ± 0.2              | 184.2 ± 29.6          |
| TCf5  | 179.4 ± 14.8           | 11.1 ± 0.2            | 3.0 ± 0.4              | 158.3 ± 14.4          |
| TCf20 | 147.9 ± 14.2           | 8.3 ± 1.0             | 3.2 ± 0.4              | 185.7 ± 12.0          |
| DCf5  | 162.4 ± 7.1            | 9.1 ± 0.7             | 3.0 ± 0.5              | 236.1 ± 60.3          |
| DCf20 | 127 ± 17.1             | 7.5 ± 1.0             | 4.9 ± 0.7              | 280.6 ± 78.6          |
